# Supplementary material for: Characterization Variation of the Differential Coloring Substances in Rapeseed Petals with Different Colors Using UPLC-HESI-MS/MS
Source: MDPI journal article supplement (doi:10.3390/molecules28155670), 2023-07-26
Supplement: s1 [file s1]

**Table S7.** The petals color and genetic background of nine rapeseed cultivars

| Rapeseed cultivars    | Petals color   | Genetic background                                                      |
|-----------------------|----------------|-------------------------------------------------------------------------|
| ‘White line’          | White          | ‘ <i>Brassica napus</i> L. ZS-1’ × ‘ <i>Brassica napus</i> L. 11-231’   |
| ‘Yellow line’         | Yellow         | ‘ <i>Brassica napus</i> L. Z11’ × ‘ <i>Brassica napus</i> L. Y4’        |
| ‘Pink line’           | Pink           | ‘ <i>Brassica napus</i> L. FD-1’ × ‘ <i>Brassica napus</i> L. 22-231’   |
| ‘Hanzi No.1 line’     | Light Purple   | ‘ <i>Brassica napus</i> L. 08-H16’ × ‘ <i>Raphanus sativus</i> L. ZH-1’ |
| ‘Ziluolan line’       | Purple         | ‘ <i>Brassica napus</i> L. 08-H16’ × ‘ <i>Raphanus sativus</i> L. ZH-3’ |
| ‘Dark purple line’    | Dark Purple    | ‘ <i>Brassica napus</i> L. 08-H16’ × ‘ <i>Raphanus sativus</i> L. ZH-3’ |
| ‘Wine red line’       | Wine Red       | ‘ <i>Brassica napus</i> L. 08-H16’ × ‘ <i>Raphanus sativus</i> L. ZH-3’ |
| ‘Watermelon Red line’ | Watermelon Red | ‘ <i>Brassica napus</i> L. QY211R’ × ‘ <i>Brassica napus</i> L.16-002’  |
| ‘Dark Red line’       | Dark Red       | ‘ <i>Brassica napus</i> L. QY211R’ × ‘ <i>Brassica napus</i> L.16-002’  |

Note: All the rapeseed lines were selected by hybrid breeding.
